# Supplementary material for: Bioactive natural products from marine sponges belonging to family Hymedesmiidae
Source: Royal Society of Chemistry journal article supplement (doi:10.1039/d1ra00228g), 2021-01-01
Supplement: d1ra00228g1.pdf [file d1ra00228g1.pdf]

**Table S1:** compounds isolated from different genera of family Hymedesmiidae

| No. | Name               | Chemical nature | Biological source                   | Biological activity                                              | Ref. |
|-----|--------------------|-----------------|-------------------------------------|------------------------------------------------------------------|------|
| 1   | Anchinopeptolide A |                 |                                     |                                                                  |      |
| 2   | Anchinopeptolide B |                 |                                     |                                                                  |      |
| 3   | Anchinopeptolide C |                 | <i>Phorbas tenacior</i>             |                                                                  |      |
| 4   | Anchinopeptolide D |                 |                                     | Displace specific ligand<br>from their receptor                  | 1    |
| 5   | Zarzissine         | Alkaloid        | <i>phorbas</i><br><i>paupertas</i>  | Antitumor and<br>anti-microbial                                  | 2    |
| 6   | Phorbatopsin A     |                 | <i>Phorbas topsenti</i>             |                                                                  |      |
| 7   | Phorbatopsin B     |                 |                                     | Anti-oxidant                                                     | 3    |
| 8   | Phorbatopsin C     |                 |                                     |                                                                  |      |
| 9   | Phorbasin B        |                 |                                     |                                                                  |      |
| 10  | Phorbasin C        |                 |                                     |                                                                  |      |
| 11  | Phorbasin D        |                 | <i>Phorbas</i> sp.                  |                                                                  |      |
| 12  | Phorbasin E        |                 |                                     | Antitumor                                                        | 4    |
| 13  | Phorbasin F        |                 |                                     |                                                                  |      |
| 14  | Phorbasin G        |                 |                                     |                                                                  |      |
| 15  | Phorbasin H        | Diterpene       |                                     | Antitumor and<br>inhibits <i>C. albicans</i><br>virulence factor |      |
| 16  | Phorbasin I        |                 | <i>Phorbas</i><br><i>gukulensis</i> | Antitumor                                                        | 4, 5 |
| 17  | Phorbasin J        |                 |                                     |                                                                  |      |
| 18  | Phorbasin K        |                 |                                     |                                                                  | 4    |
| 19  | Gagunin A          |                 |                                     |                                                                  |      |
| 20  | Gagunin B          |                 |                                     | Antitumor                                                        |      |
| 21  | Gagunin C          |                 |                                     |                                                                  | 6, 7 |
| 22  | Gagunin D          |                 |                                     | Antitumor and<br>anti-melanogenic                                |      |

|    |                        |                 |                    |                                                   |           |
|----|------------------------|-----------------|--------------------|---------------------------------------------------|-----------|
| 23 | Gagunin E              |                 |                    |                                                   | 6, 7, 8   |
| 24 | Gagunin F              | Diterpene       |                    |                                                   |           |
| 25 | Gagunin G              |                 |                    |                                                   |           |
| 26 | Gagunin H              |                 |                    |                                                   |           |
| 27 | Gagunin I              |                 |                    |                                                   |           |
| 28 | Gagunin J              |                 | <i>Phorbas</i> sp. |                                                   |           |
| 29 | Gagunin K              |                 |                    |                                                   |           |
| 30 | Gagunin L              |                 |                    |                                                   | 6, 7      |
| 31 | Gagunin M              |                 |                    |                                                   |           |
| 32 | Gagunin N              |                 |                    |                                                   |           |
| 33 | Gagunin O              |                 |                    | Antitumor                                         |           |
| 34 | Gagunin P              |                 |                    |                                                   |           |
| 35 | Gagunin Q              |                 |                    |                                                   |           |
| 36 | Gukulenin A            |                 |                    |                                                   |           |
| 37 | Gukulenin B            |                 |                    |                                                   | 9, 10, 11 |
| 38 | Gukulenin C            | Tetraterpenoid  | <i>Phorbas</i>     |                                                   | 9         |
| 39 | Gukulenin D            |                 | <i>gukhulensis</i> |                                                   |           |
| 40 | Gukulenin E            |                 |                    |                                                   | 10        |
| 41 | Gukulenin F            |                 |                    |                                                   |           |
| 42 | Phorbaketal A          |                 |                    | Cytotoxic and anti-inflammatory                   | 10        |
| 43 | Phorbaketal B          |                 |                    |                                                   | 12, 13    |
| 44 | Phorbaketal C          |                 |                    |                                                   |           |
| 45 | Phorbaketal derivative |                 |                    |                                                   |           |
| 46 | Phorbaketal L          |                 |                    | Cytotoxic                                         |           |
| 47 | Phorbaketal N          |                 |                    |                                                   | 12        |
| 48 | Alotaketal C           |                 | <i>Phorbas</i> sp. | Anti-viral<br>And activate cAMP signaling pathway |           |
| 49 | Alotaketal D           |                 |                    | Anti-viral                                        | 14, 15    |
| 50 | Ansellone A            |                 |                    | Anti-viral and activate cAMP signaling pathway    | 14        |
| 51 | Anvilone A             | Sesterterpenoid |                    | Anti-viral                                        | 14, 15    |

|    |                         |                 |                          |                                               |           |
|----|-------------------------|-----------------|--------------------------|-----------------------------------------------|-----------|
| 52 | Ansellone B1            |                 |                          |                                               | 14        |
| 53 | Phorbasone A acetate    |                 |                          | Anti-inflammatory                             | 16        |
| 54 | Isosuberitenone B       |                 |                          |                                               | 16        |
| 55 | 19- episuberitenone B   |                 |                          |                                               |           |
| 56 | Isoxaspirosuberit-enone |                 |                          |                                               |           |
| 57 | Suberitenone B          |                 | <i>Phorbas areolatus</i> | Cytotoxic                                     | 17        |
| 58 | Oxaspirosuberite-none   | Sesterterpenoid | <i>Phorbas areolatus</i> | Cytotoxic<br>and antimicrobial                | 17        |
| 59 | Phorbasterone A         |                 |                          |                                               |           |
| 60 | Phorbasterone B         |                 | <i>Phorbas</i>           |                                               |           |
| 61 | Phorbasterone C         | Steroid         | <i>amaranthus</i>        | Cytotoxic                                     | 18        |
| 62 | Phorbasterone D         |                 |                          |                                               |           |
| 63 | Phorboxazole A          |                 |                          | Antimicrobial                                 |           |
| 64 | Phorboxazole B          | Macrolide       |                          |                                               | 19        |
| 65 | Phorbaside A            |                 | <i>Phorbas sp.</i>       |                                               |           |
| 66 | Phorbaside C            | Macrolide       |                          |                                               |           |
| 67 | Phorbaside D            | glycoside       |                          | Cytotoxic                                     | 20        |
| 68 | Phorbaside E            |                 |                          |                                               |           |
| 69 | Astaxanthin             |                 |                          |                                               |           |
| 70 | Adonirubin              |                 | <i>Phorbas topsenti</i>  |                                               | 3         |
| 71 | Taurine                 |                 |                          | Antioxidant                                   |           |
| 72 | Taurobetain             |                 |                          |                                               |           |
| 73 | p-hydroxybenzalde-hyde  |                 | <i>Phorbas paupertas</i> | Antioxidant                                   | 2         |
| 74 | Hamigeran A             |                 |                          | Cytotoxic                                     |           |
| 75 | Hamigeran B             |                 |                          | Cytotoxic,<br>Antiviral and<br>anti-microbial |           |
| 76 | Hamigeran C             |                 | <i>Hamigera</i>          | Cytotoxic and                                 | 21, 22,23 |
| 77 | Hamigeran D             | Diterpene       | <i>tarangaensis</i>      | anti-microbial                                |           |
| 78 | Debromohamiger-an A     |                 |                          |                                               |           |
| 79 | 4-bromohamigera A       |                 |                          | Cytotoxic activity                            |           |
| 80 | 4-bromohamigeran B      |                 |                          |                                               |           |
| 81 | Debromohamiger-an B     |                 |                          |                                               |           |

|     |                                   |                 |  |                      |                                      |           |
|-----|-----------------------------------|-----------------|--|----------------------|--------------------------------------|-----------|
| 82  | Hamigeran F                       |                 |  |                      | Cytotoxic                            |           |
| 83  | Hamigeran G                       |                 |  |                      | Cytotoxic and anti-microbial         |           |
| 84  | Hamigeran H                       |                 |  |                      |                                      |           |
| 85  | Hamigeran I                       |                 |  |                      |                                      |           |
| 86  | Hamigeran J                       |                 |  |                      |                                      |           |
| 87  | Hamigeran K                       |                 |  |                      |                                      |           |
| 88  | Hamigeran L                       |                 |  |                      |                                      |           |
| 89  | Hamigeran M                       |                 |  |                      |                                      |           |
| 90  | Hamigeran N                       |                 |  | <i>Hamigera</i>      |                                      | 21, 22,23 |
| 91  | Hamigeran O                       | Diterpene       |  | <i>tarangaensis</i>  |                                      |           |
| 92  | Hamigeran P                       |                 |  |                      |                                      |           |
| 93  | Hamigeran Q                       |                 |  |                      | Cytotoxic                            |           |
| 94  | Debromohamiger-an I               |                 |  |                      |                                      |           |
| 95  | Debromohamiger-an J               |                 |  |                      |                                      |           |
| 96  | 4-bromohamigeran K                |                 |  |                      |                                      |           |
| 97  | Hamigeran L 11-O-methyl ester     |                 |  |                      |                                      |           |
| 98  | Hamigeran L 12-O-methyl ester     |                 |  |                      |                                      |           |
| 99  | 10-epihamigeran K                 |                 |  |                      |                                      |           |
| 100 | 18-epihamigeran N                 |                 |  |                      |                                      |           |
| 101 | 18-epihamigeran P                 |                 |  |                      |                                      |           |
| 102 | 19-epihamigeran Q                 |                 |  | <i>Hamigera</i>      | Cytotoxic                            | 21, 22,23 |
|     |                                   | Diterpene       |  | <i>tarangaensis</i>  |                                      |           |
| 103 | Alotaketala A                     | Sesterterpenoid |  |                      | Activate cAMP cell signaling pathway |           |
| 104 | Alotaketala B                     |                 |  | <i>Hamigera</i> sp.  |                                      | 24        |
| 105 | Variolin A                        |                 |  |                      | Antitumor                            |           |
| 106 | Variolin B                        |                 |  | <i>Kirkpatrickia</i> | Antitumor and antiviral              | 25        |
| 107 | N (3')-methyltetrahydrovariolin B |                 |  | <i>variolosa</i>     | Antitumor and anti-microbial         |           |

|     |                                                |                 |                          |                                            |        |
|-----|------------------------------------------------|-----------------|--------------------------|--------------------------------------------|--------|
| 108 | Ptilomycaline A                                |                 | <i>Hemimycale</i> sp.    | Antitumor ,<br>antiviral and<br>antifungal | 26, 27 |
|     |                                                | Alkaloid        |                          |                                            |        |
| 109 | (Z)-5-(4-<br>hydroxybenzylidene)-<br>hydantoin |                 |                          | Antitumor and<br>anti-microbial            | 28, 29 |
| 110 | Hemimycalin A                                  |                 |                          |                                            | 30, 31 |
| 111 | Hemimycalin B                                  |                 | <i>Hemimycale</i>        | Anti-microbial                             | 31     |
| 112 | [1,3]-diazepan-2-one                           |                 | <i>arabica</i>           |                                            |        |
| 113 | (S)-1,4-diaza-<br>cyclododecane-2,3-dion       | -               |                          | Antitumor and<br>hypoglycemic              | 31     |
| 114 | Cycloanchinopep-tolide C                       |                 |                          | —                                          | 32     |
| 115 | Anchinopeptolide E                             |                 | <i>Phorbas tenacior</i>  | —                                          | 33     |
| 116 | Phorbazole A                                   |                 |                          | —                                          |        |
| 117 | Phorbazole B                                   |                 | <i>Phorbas clathrata</i> | —                                          |        |
| 118 | Phorbazole C                                   | Alkaloid        |                          | —                                          | 34     |
| 119 | Phorbazole D                                   |                 |                          | —                                          |        |
| 120 | Hemi- phorbaxazole A                           | Macrolide       |                          |                                            | 35     |
| 121 | Phorbasin A                                    |                 | <i>Phorbas</i> sp.       | —                                          | 36     |
| 122 | Phorbasin G1                                   |                 | <i>Phorbas</i>           |                                            |        |
| 123 | Phorbasin H1                                   | Diterpene       | <i>gukulensis</i>        |                                            | 37, 52 |
| 124 | Phorbasin I1                                   |                 |                          |                                            |        |
| 125 | Phorbasin H dervative                          |                 |                          | —                                          | 6      |
| 126 | Phorbaside B                                   |                 |                          | —                                          | 20     |
| 127 | Phorbaside F                                   |                 |                          | —                                          | 38     |
| 128 | Phorbaside G                                   | Macrolide       | <i>Phorbas</i> sp.       | —                                          |        |
| 129 | Phorbaside H                                   | glycoside       |                          | —                                          | 39     |
| 130 | Phorbaside I                                   |                 |                          | —                                          |        |
| 131 | Anthosterone A                                 |                 | <i>Phorbas</i>           | —                                          |        |
| 132 | Anthosterone B                                 | Steroid         | <i>amaranthus</i>        | —                                          | 18     |
| 133 | Secoepoxy ansellone A                          |                 |                          | —                                          | 15     |
| 134 | Ansellone B                                    |                 |                          | —                                          | 15     |
| 135 | Ansellone C                                    |                 |                          | —                                          |        |
| 136 | Ansellone D                                    | Sesterterpenoid | <i>Phorbas</i> sp.       | —                                          |        |
| 137 | Ansellone E                                    |                 |                          | —                                          | 40     |
| 138 | Ansellone F                                    |                 |                          | —                                          |        |
| 139 | Ansellone G                                    |                 |                          | —                                          |        |

|     |                                                                   |                          |                                  |   |    |
|-----|-------------------------------------------------------------------|--------------------------|----------------------------------|---|----|
| 140 | Amaranzole A                                                      | N- imidazolyl<br>steroid | <i>Phorbas<br/>amaranthus</i>    | — | 41 |
| 141 | Amaranzole B                                                      |                          |                                  | — |    |
| 142 | Amaranzole C                                                      |                          |                                  | — |    |
| 143 | Amaranzole D                                                      | N- imidazolyl            |                                  | — | 42 |
| 144 | Amaranzole E                                                      | steroid                  | <i>Phorbas</i>                   | — |    |
| 145 | Amaranzole F                                                      |                          | <i>amaranthus</i>                | — |    |
| 146 | Amaroxocane A                                                     | Steroid                  |                                  | — |    |
| 147 | Amaroxocane B                                                     |                          |                                  | — | 43 |
| 148 | 6-(p-hydroxyphenol)-2H-<br>3,4-dihydro-1,1-dioxo-1,4-<br>Thiazine |                          |                                  | — |    |
| 149 | Tripeptide L-Glu-Glp-4-<br>Hydroxystirylami-ne                    |                          | <i>Phorbas<br/>tenacior</i>      | — | 44 |
| 150 | Muironolide A                                                     |                          |                                  | — | 45 |
| 151 | Phorone A                                                         |                          | <i>Phorbas sp.</i>               | — |    |
| 152 | Isophorbasone A                                                   |                          |                                  | — | 16 |
| 153 | Phorbadione                                                       |                          |                                  | — | 15 |
| 154 | Suberitenone A                                                    | Sesterterpenoid          | <i>Phorbas areolatus</i>         | — | 17 |
| 155 | Anvilone B                                                        |                          |                                  | — | 40 |
| 156 | Alotaketala E                                                     |                          | <i>Phorbas sp.</i>               | — |    |
| 157 | Variolin D                                                        | Alkaloid                 | <i>Kirkpatricka</i>              | — | 26 |
| 158 | 3,4',5-triacetoxystilbene                                         |                          | <i>varialosa</i>                 | — | 46 |
| 159 | 3 $\beta$ ,4 $\beta$ -dihydroxy-pregn-5-<br>en-20-one-3-sulfate   | Sterol                   | <i>Hymedesmia<br/>aistralis</i>  | — | 47 |
| 160 | bromo benzocyclooctane                                            |                          |                                  | — | 48 |
| 161 | 12-Acetoxy-13-epi-<br>neoverrucosan-5-one                         |                          | <i>Hamigera<br/>tarangaensis</i> | — |    |
| 162 | Hamigeran E                                                       |                          |                                  | — | 21 |
| 163 | Debromohamigeran E                                                | Diterpene                |                                  | — | 49 |

|     |                                                                    |            |                              |   |          |
|-----|--------------------------------------------------------------------|------------|------------------------------|---|----------|
| 164 | Hamigeramine A                                                     | Alkaloid   |                              | — |          |
| 165 | Hamiguanasinol A                                                   | Nucleoside |                              | — | 49       |
| 166 | Hamigerol A                                                        |            | <i>Hamigera hamigera</i>     | — | 50       |
| 167 | Hamigerol B                                                        | Sterol     |                              | — |          |
| 168 | 24 ethyl -5 $\alpha$ -cholest-7-en-3 $\beta$ -ol                   |            |                              | — |          |
| 169 | P-hydroxy cinnamaldehyde                                           |            |                              | — | 51       |
| 170 | Diosphenol hamigeran G                                             |            |                              | — |          |
| 171 | Hamigeran A ethyl ester                                            |            |                              | — |          |
| 172 | 18-epi-hamigeran Q                                                 | Diterpene  | <i>Hamigera tarangaensis</i> | — | 21<br>22 |
| 173 | Hamigeran R                                                        |            | <i>Hamigera</i>              | — |          |
| 174 | Hamigeran S                                                        | Diterpene  | <i>tarangaensis</i>          | — | 23       |
| 175 | (R)-5-(4-hydroxybenzyl)hydantoin                                   |            |                              | — |          |
| 176 | (Z)-5-((6-bromo-1H-indol-3-yl)methylene)-hydantoin                 |            |                              | — |          |
| 177 | 4-acetamido-2,6-dibromo-4-hydroxy-1,1-dimethoxycyclohexa-2,5-diene |            |                              | — |          |
| 178 | 2,4-bis(1-methyl-1-phenylethyl)-phenol                             |            |                              | — |          |
| 179 | $\beta$ - Sitosterol                                               |            | <i>Hemimycale arabica</i>    | — | 32       |
| 180 | Bis-[2-ethyl]-hexyl-phthylester                                    |            |                              | — |          |
| 181 | Linoleic acid                                                      |            |                              | — |          |

## References:

1. B. B. Snider, F. Song and B. M. Foxman, *The Journal of organic chemistry*, 2000, **65**, 793-800.
2. N. Bouaicha, P. Amade, D. Puel and C. Roussakis, *Journal of natural products*, 1994, **57**, 1455-1457.
3. T. D. Nguyen, X. C. Nguyen, A. Longeon, A. Keryhuel, M. H. Le, Y. H. Kim and M.-L. Bourguet-Kondracki, *Tetrahedron*, 2012, **68**, 9256-9259.
4. H. Zhang, J. M. Major, R. J. Lewis and R. J. Capon, *Organic & biomolecular chemistry*, 2008, **6**, 3811-3815.
5. S.-H. Lee, J.-e. Jeon, C.-H. Ahn, S.-C. Chung, J. Shin and K.-B. Oh, *Applied microbiology and biotechnology*, 2013, **97**, 3141-3148.
6. K. H. Jang, J.-e. Jeon, S. Ryu, H.-S. Lee, K.-B. Oh and J. Shin, *Journal of natural products*, 2008, **71**, 1701-1707.
7. K. E. Kim, Y. Sakazaki and B. M. Stoltz, *Tetrahedron*, 2019, 130755.
8. H. Y. Lee, E. J. Jang, S. Y. Bae, J.-e. Jeon, H. J. Park, J. Shin and S. K. Lee, *Marine drugs*, 2016, **14**, 212.
9. S. Y. Park, H. Choi, H. Hwang, H. Kang and J.-R. Rho, *Journal of natural products*, 2010, **73**, 734-737.
10. J.-e. Jeon, L. Liao, H. Kim, C. J. Sim, D.-C. Oh, K.-B. Oh and J. Shin, *Journal of natural products*, 2013, **76**, 1679-1685.
11. J.-H. Ahn, J.-H. Woo, J.-R. Rho and J.-H. Choi, *Marine drugs*, 2019, **17**, 126.
12. J.-R. Rho, B. S. Hwang, C. J. Sim, S. Joung, H.-Y. Lee and H.-J. Kim, *Organic letters*, 2009, **11**, 5590-5593.
13. Y.-J. Seo, K.-T. Lee, J.-R. Rho and J.-H. Choi, *Marine drugs*, 2015, **13**, 7005-7019.
14. R. J. Andersen, F. Ntie-Kang and I. Tietjen, *Antiviral research*, 2018, **158**, 63-77.
15. J. Daoust, M. Chen, M. Wang, D. E. Williams, M. A. G. Chavez, Y. A. Wang, C. E. Merchant, A. Fontana, T. J. Kieffer and R. J. Andersen, *The Journal of Organic Chemistry*, 2013, **78**, 8267-8273.
16. W. Wang, Y. Lee, T. G. Lee, B. Mun, A. G. Giri, J. Lee, H. Kim, D. Hahn, I. Yang and J. Chin, *Organic letters*, 2012, **14**, 4486-4489.
17. H. Solanki, C. Angulo-Preckler, K. Calabro, N. Kaur, P. Lasserre, B. Cautain, M. de la Cruz, F. Reyes, C. Avila and O. P. Thomas, *Tetrahedron Letters*, 2018, **59**, 3353-3356.
18. M. N. Masuno, J. R. Pawlik and T. F. Molinski, *Journal of natural products*, 2004, **67**, 731-733.
19. P. A. Searle and T. F. Molinski, *Journal of the American Chemical Society*, 1995, **117**, 8126-8131.
20. J. B. MacMillan, G. Xiong-Zhou, C. K. Skepper and T. F. Molinski, *The Journal of organic chemistry*, 2008, **73**, 3699-3706.
21. A. J. Singh, J. D. Dattelbaum, J. J. Field, Z. Smart, E. F. Woolly, J. M. Barber, R. Heathcott, J. H. Miller and P. T. Northcote, *Organic & biomolecular chemistry*, 2013, **11**, 8041-8051.
22. J. D. Dattelbaum, A. J. Singh, J. J. Field, J. H. Miller and P. T. Northcote, *The Journal of organic chemistry*, 2015, **80**, 304-312.



23. E. F. Woolly, A. J. Singh, E. R. Russell, J. H. Miller and P. T. Northcote, *Journal of natural products*, 2018, **81**, 387-393.
24. R. Forestieri, C. E. Merchant, N. J. de Voogd, T. Matainaho, T. J. Kieffer and R. J. Andersen, *Organic Letters*, 2009, **11**, 5166-5169.
25. G. Trimurtulu, D. J. Faulkner, N. B. Perry, L. Ettouati, M. Litaudon, J. W. Blunt, M. H. Munro and G. B. Jameson, *Tetrahedron*, 1994, **50**, 3993-4000.
26. C. Imperatore, A. Aiello, F. D'Aniello, M. Senese and M. Menna, *Molecules*, 2014, **19**, 20391-20423.
27. N. B. Perry, L. Ettouati, M. Litaudon, J. W. Blunt, M. H. Munro, S. Parkin and H. Hope, *Tetrahedron*, 1994, **50**, 3987-3992.
28. Y. Kashman, S. Hirsh, O. J. McConnell, I. Ohtani, T. Kusumi and H. Kakisawa, *Journal of the American Chemical Society*, 1989, **111**, 8925-8926.
29. I. Ohtani, T. Kusumi, H. Kakisawa, Y. Kashman and S. Hirsh, *Journal of the American Chemical Society*, 1992, **114**, 8472-8479.
30. M. A. Khanfar, B. A. Asal, M. Mudit, A. Kaddoumi and K. A. El Sayed, *Bioorganic & medicinal chemistry*, 2009, **17**, 6032-6039.
31. D. T. Youssef, L. A. Shaala and K. Z. Alshali, *Marine drugs*, 2015, **13**, 6609-6619.
32. M. Shaaban, A. Z. Hassan, M. M. Soltan and A. B. Abdelwahab, *Medicinal Chemistry Research*, 2018, **27**, 2079-2088.
33. S. Bastos Lemos Silva, M. A. Beniddir, J. F. Gallard, E. Poupon, O. P. Thomas and L. Evanno, *European Journal of Organic Chemistry*, 2019, **2019**, 5515-5518.
34. A. Rudi, Z. Stein, S. Green, I. Goldberg, Y. Kashman, Y. Benayahu and M. Schleyer, *Tetrahedron letters*, 1994, **35**, 2589-2592.
35. D. S. Dalisay and T. F. Molinski, *Organic Letters*, 2009, **11**, 1967-1970.
36. D. Vuong and R. J. Capon, *Journal of natural products*, 2000, **63**, 1684-1685.
37. H.-S. Lee, S. Y. Park, C. J. Sim and J.-R. Rho, *Chemical and Pharmaceutical Bulletin*, 2008, **56**, 1198-1200.
38. D. S. Dalisay and T. F. Molinski, *Journal of natural products*, 2009, **72**, 739-744.
39. D. S. Dalisay and T. F. Molinski, *Journal of natural products*, 2010, **73**, 679-682.
40. M. Wang, I. Tietjen, M. Chen, D. E. Williams, J. Daoust, M. A. Brockman and R. J. Andersen, *The Journal of Organic Chemistry*, 2016, **81**, 11324-11334.
41. B. I. Morinaka, M. N. Masuno, J. R. Pawlik and T. F. Molinski, *Organic Letters*, 2007, **9**, 5219-5222.
42. B. I. Morinaka, J. R. Pawlik and T. F. Molinski, *The Journal of organic chemistry*, 2010, **75**, 2453-2460.
43. B. I. Morinaka, J. R. Pawlik and T. F. Molinski, *Journal of natural products*, 2009, **72**, 259-264.
44. A. Casapullo, L. Minale and F. Zollo, *Tetrahedron letters*, 1994, **35**, 2421-2422.
45. D. S. Dalisay, B. I. Morinaka, C. K. Skepper and T. F. Molinski, *Journal of the American Chemical Society*, 2009, **131**, 7552-7553.
46. G. S. Jayatilake, B. J. Baker and J. B. McClintock, *Journal of Natural Products*, 1995, **58**, 1958-1960.
47. M. R. Prinsep, J. W. Blunt and M. H. Munro, *Journal of Natural Products*, 1989, **52**, 657-659.
48. R. C. Cambie, A. R. Lal, M. R. Kernan and P. R. Bergquist, *Journal of natural products*, 1995, **58**, 940-942.
49. K. D. Wellington, R. C. Cambie, P. S. Rutledge and P. R. Bergquist, *Journal of natural products*, 2000, **63**, 79-85.

50. J.-F. Cheng, J.-S. Lee, F. Sun, E. A. Jares-Erijman, S. Cross and K. L. Rinehart, *Journal of natural products*, 2007, **70**, 1195-1199.
51. W. H. HASSAN, Z. I. EL-SAYED and P. PROKSCH.
52. Indeed, there has been a lack of continuity in the naming of the phorbasins in the literature. The name phorbasins (G-I) (14-16) were coined in **2008** by Zhang, et al. (Phorbasins G-K: New cytotoxic diterpenes from a southern Australian marine sponge, *Phorbas* sp. ) and also used for a different structure in **2008** by Lee, et al (Phorbasins G--I: three new diterpenoids from the sponge *Phorbas gukulensis* *Chemical and Pharmaceutical Bulletin*, 2008, **56**, 1198-1200). We therefore propose the renaming of Hyi-Seung LEE, 2008 compounds as phorbasins (G1-I1) (122-124).
